# Supplementary material for: In situ hydrothermal synthesis of nickel cobalt sulfide nanoparticles embedded on nitrogen and sulfur dual doped graphene for a high performance supercapacitor electrode
Source: Royal Society of Chemistry journal article supplement (doi:10.1039/d1ra03607f), 2021-01-01
Supplement: d1ra03607f1.pdf [file d1ra03607f1.pdf]

**Supplementary Information**

***In situ* hydrothermal synthesis of nickel cobalt sulfide nanoparticles embedded on nitrogen and sulfur dual doped graphene for high performance supercapacitor electrode**

**Nutthapong Poompiew<sup>a</sup>, Prasit Pattananuwat<sup>a, b, c,\*□</sup>, and Pranut Potiyaraj<sup>a, c, d\*□</sup>**

<sup>a</sup>Department of Materials Science, Faculty of Science, Chulalongkorn University, Bangkok, 10330, Thailand

<sup>b</sup>Research Unit of Advanced Materials for Energy Storage, Chulalongkorn University, Bangkok, Thailand

<sup>c</sup>Center of Excellence on Petrochemical and Materials Technology, Chulalongkorn University, Bangkok, Thailand

<sup>d</sup>Center of Excellence in Responsive Wearable Materials, Chulalongkorn University, Bangkok, Thailand

---

\*Corresponding author. Tel.: +66 2 218 5544; Fax: +66 2 218 5561

E-mail address: prasit.pat@chula.ac.th, pranut.p@chula.ac.th

□these authors contributed equally to this work

The mechanism contribution for the NS-G/NCS sample is calculated from the relationship between the peak current of redox peak ( $i$ ) and scan rate ( $v$ ) by following on equation:

$$i = k_1v + k_2v^{1/2}$$

As seen in figure S1, the fitted linear equation is  $y = 0.6813x + 0.0573$ . Thus, the slope of fitted linear is  $k_1$  and  $k_2$  is y-axis interception value. The term of calculated  $k_2v^{1/2}$  is represented to ionic diffusion contribution and the term of  $k_1v$  is referred to capacitive contribution.

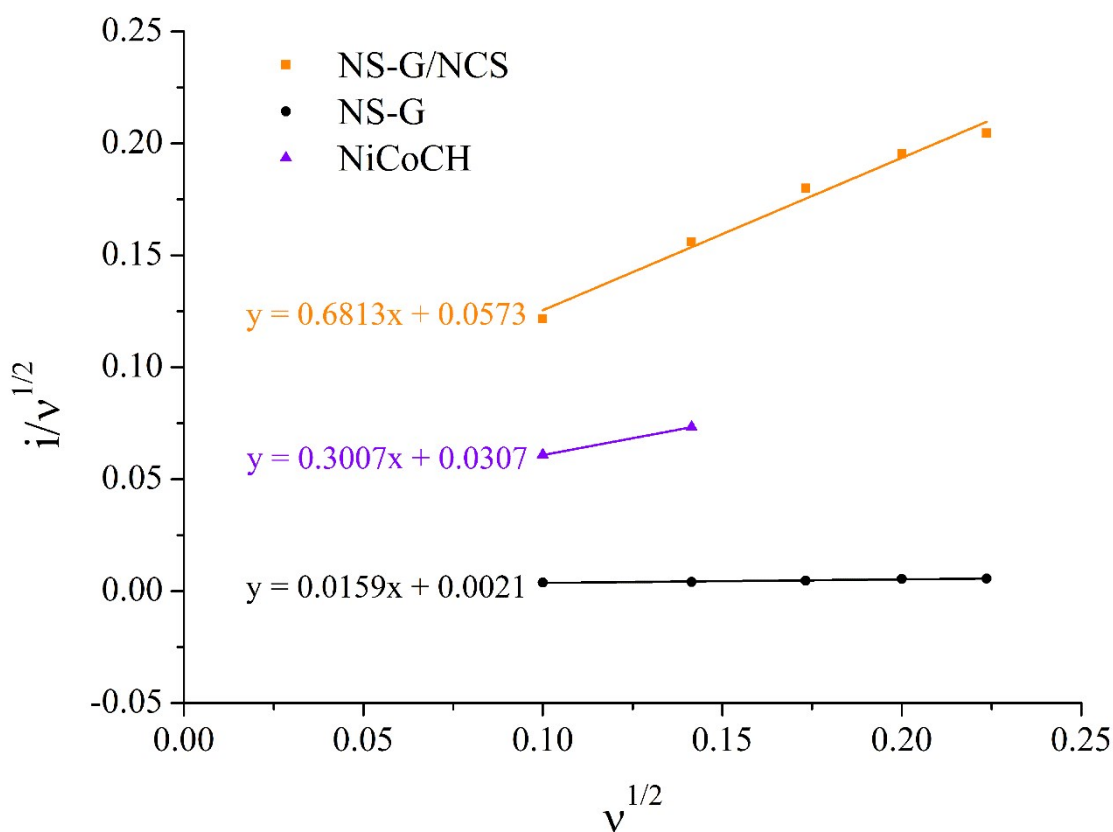

Fig. S1 The relationship plotting of NS-G, NiCoCH and NS-G/NCS electrodes.

The series of coin cells from the NS-G/NCS samples (four cells;  $0.47 \times 4 = 1.88 \text{ V}$ ) are connected with LED diode (1.6 V) as illustrated in Fig. S2.

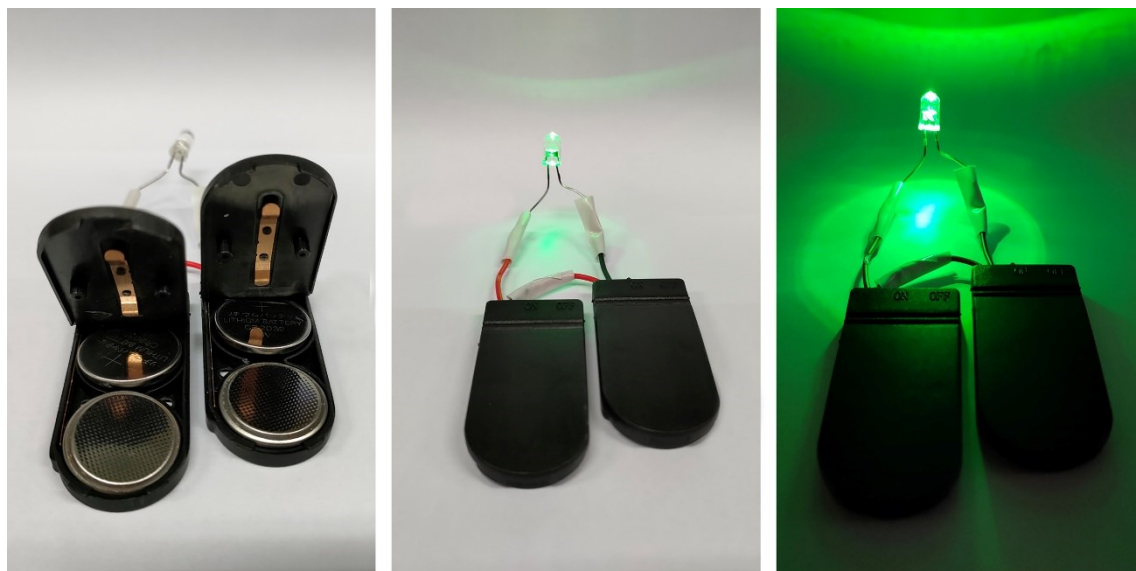

Fig. S2 The series of fourth coin cells from the NS-G/NCS samples.

The various ratios of NS-G to NCS samples were examined by CVs with different scan rate as shown in Fig. S3.

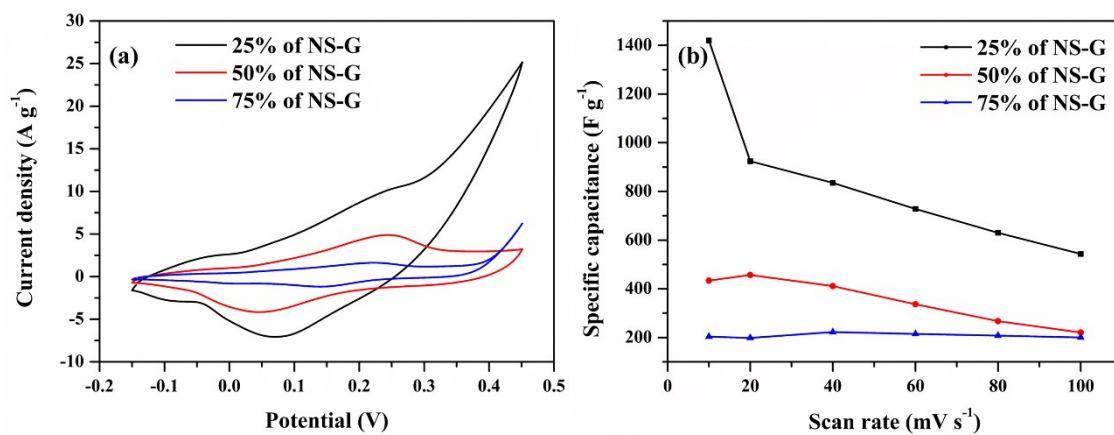

Fig. S3 The CV curves of various NS-G/NCS ratios (a) and the specific capacitance at different scan rate of various NS-G/NCS ratios (b).
